# Supplementary material
Source: PubMed Central journal article supplement (PMC6171807)
Supplement: jciinsight-3-120750-s040.pdf [file jciinsight-3-120750-s040.pdf]

Supplementary Data

Table S1: Cell line background information

| Cells  | Patient                                     | Age | Sex | Primary Tumor Site and Histology                                                                                                                                            | Metastasis |
|--------|---------------------------------------------|-----|-----|-----------------------------------------------------------------------------------------------------------------------------------------------------------------------------|------------|
| Hacats |                                             |     |     | Immortalized human keratinocyte                                                                                                                                             | N/A        |
| A431   |                                             | 85  | F   | Epidermoid carcinoma                                                                                                                                                        | No         |
| SCCT1  | Immunosuppressed renal transplant.          | 61  | M   | Forearm. Well differentiated.                                                                                                                                               | No         |
| SCCT8  | Immunosuppressed renal transplant.          | 67  | M   | Ear. Poorly differentiated.                                                                                                                                                 | Yes        |
| MET1   | Immunosuppressed renal transplant           | 45  | M   | Back of hand, invasive SCC. Acantholytic SCC. Subsequent local recurrences (x2)                                                                                             | Yes        |
| MET4   | Same patient as MET1 (isogenic cell lines). | 45  | M   | Axillary LN metastasis of MET1 recurrence – also metastasized to cervical LNs, bones and lung despite cessation of immunosuppression. Histology – poorly differentiated SCC | Yes        |

Table S2: Patient cohort demographics and tumor features

| Pt No | Dx  | Demographic | Tumor site | Outcome                    | Differentiation | BWH Stage |
|-------|-----|-------------|------------|----------------------------|-----------------|-----------|
| 1     | S   | 83M         | Hand       |                            | Well            | 1         |
| 2     | I   | 76M         | Scalp      |                            | Well            | 1         |
| 3     | S   | 76M         | Ear        |                            | Well            | 1         |
|       | S   | 76M         | Hand       |                            | Mod             | 1         |
| 4     | I   | 87F         | Hand       |                            | Mod             | 1         |
|       | I   | 87F         | Neck       |                            | Mod             | 1         |
|       | I   | 87F         | Leg        |                            | Mod             | 1         |
|       | I   | 87F         | Hand       |                            | Mod             | 1         |
| 5     | S   | 77M         | Hand       |                            | Mod             | 1         |
| 6     | S   | 82M         | Arm        |                            | Mod             | 1         |
|       | I   | 81M         | Hand       |                            | Mod             | 1         |
| 7     | T   | 72M         | Arm        |                            | Mod             | 1         |
|       | T   | 73M         | Neck       |                            | Mod             | 1         |
| 9     | I   | 84M         | Scalp      |                            | Well            | 2A        |
|       | S   | 83M         | Scalp      |                            | Mod             | 2A        |
| 10    | I   | 81M         | Leg        |                            | Mod             | 2A        |
| 11    | PNI | 96F         | Forehead   |                            | Mod             | 2A        |
| 12    | PNI | 86M         | Scalp      |                            | Mod             | 2A        |
| 13    | T   | 78M         | Chest      |                            | Mod             | 1         |
|       | T   | 77M         | Leg        |                            | Mod             | 1         |
|       | T   | 77M         | Temple     |                            | Poor            | 2A        |
| 8     | T   | 74F         | Leg        |                            | Mod             | 1         |
|       | T   | 74F         | Arm        |                            | Mod             | 2A        |
|       | T   | 74F         | Back       |                            | Poor            | 2A        |
| 14    | PNI | 64M         | Temple     |                            | Mod             | 2B        |
| 15    | PNI | 81M         | Temple     |                            | Mod             | 2B        |
| 16    | PNI | 45F         | Forehead   |                            | Mod             | 2B        |
|       | PNI | 81M         | Face       |                            | Mod             | 2B        |
| 18    | I   | 63M         | Chest      | Mets                       | Mod             | 2B        |
| 17    | PNI | 78M         | Scalp      |                            | Poor            | 2B        |
| 19    | I   | 88M         | Ear        |                            | Poor            | 2B        |
| 20    | T   | 50F         | Chest      |                            | Poor            | 2B        |
|       | T   | 50F         | Leg        |                            | Poor            | 2B        |
| 21    | PNI | 65M         | Ear        |                            | Poor            | 3         |
| 22    | PNI | 90M         | Arm        |                            | Poor            | 3         |
| 23    | I   | 70M         | Temple     | Mets, Death related to SCC | Poor            | 3         |
|       | I   | 71M         | Chest      | Mets, Death related to SCC | Poor            | 3         |
| 24    | PNI | 88M         | Scalp      | Mets, Death related to SCC | Poor            | 3         |

Figure S1:

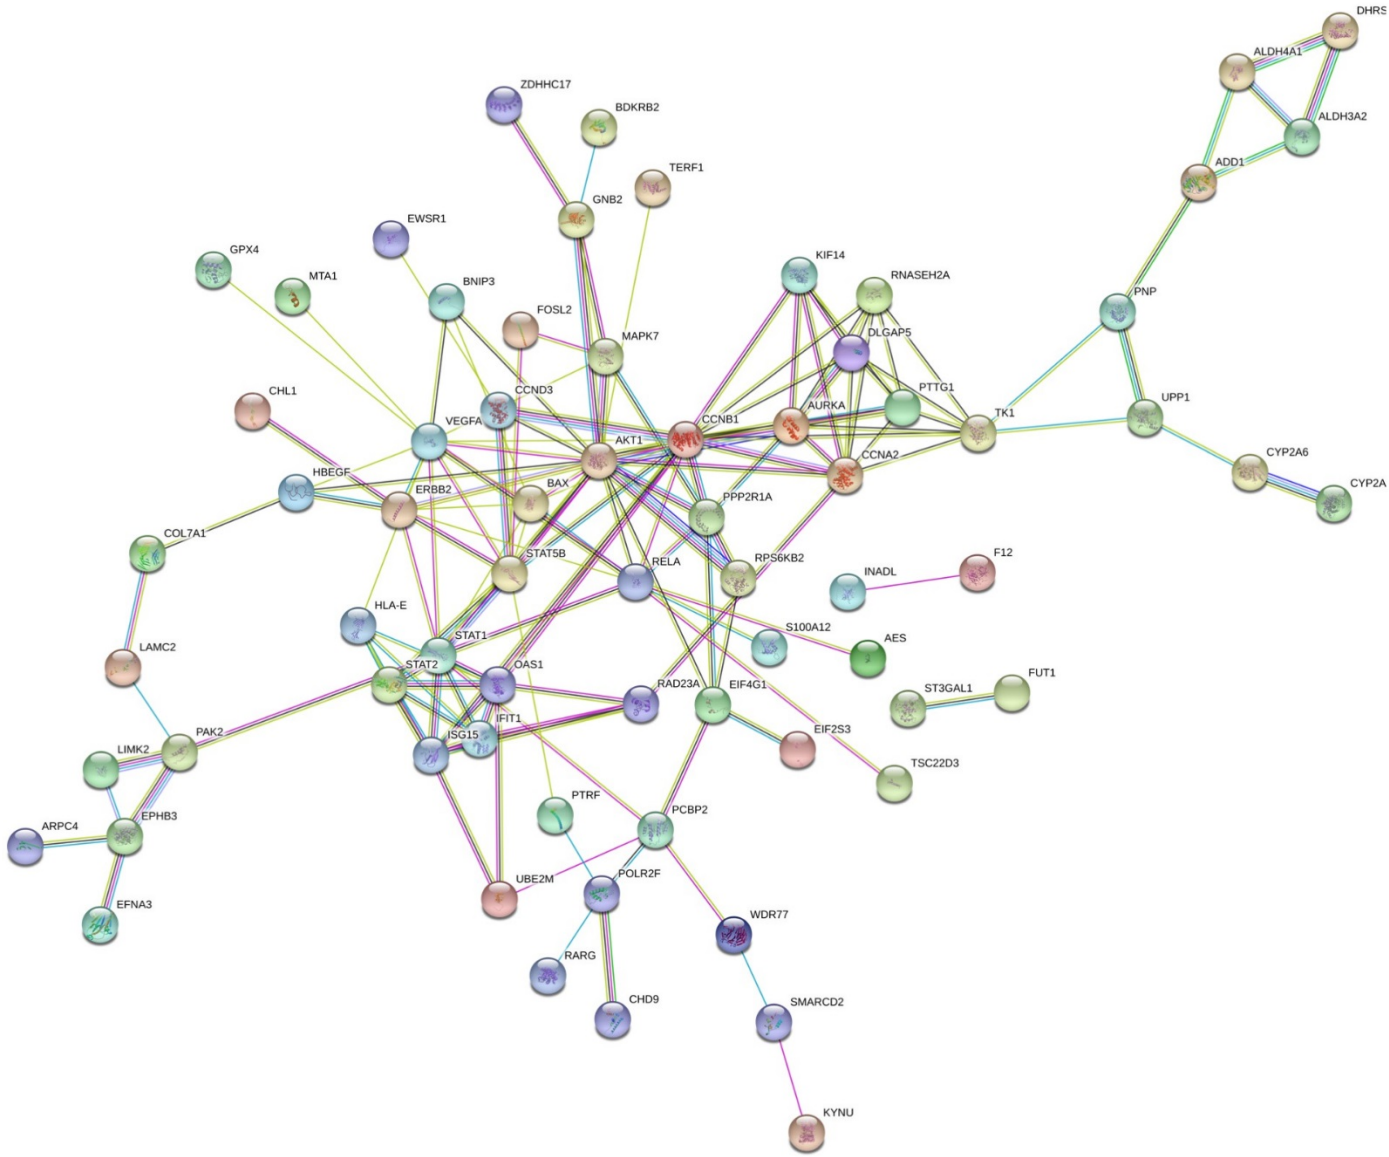

**Figure S1:** STRING network visualization of differentially expressed proteins between squamous cell carcinoma (SCC) and transplant-associated SCC (TSCC) from microarray data of 8 SCCs, 5 TSCCs and 10 normal skin samples.

Figure S2:

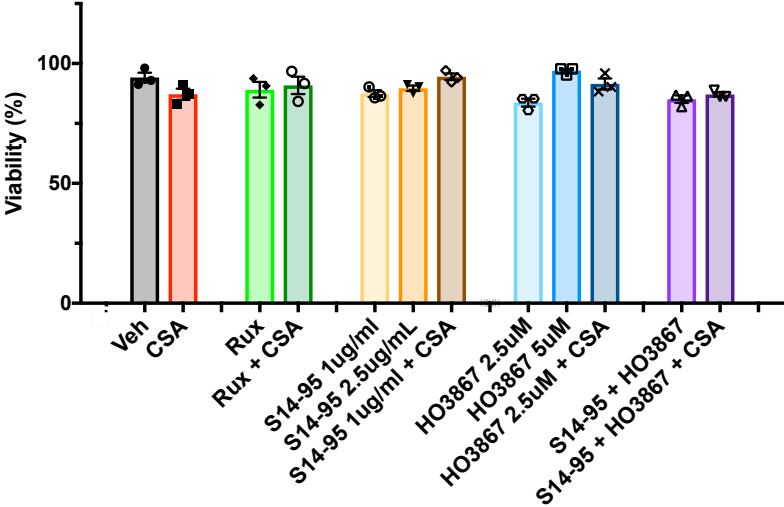

**Figure S2:** Cell viability determined by trypan blue staining of A431 squamous cell carcinoma (SCC) cells treated with Cyclosporine A (CSA, 25ug/mL), Ruxolitinib (10uM), STAT1 $\alpha$  inhibitor s14-95, STAT3 inhibitor HO-3867, or combinations of the above reveals nil significant differences from vehicle alone in any treatment condition.
